# Supplementary material
Source: publisher figshare collection journal article supplement (https://acs.figshare.com/ndownloader/files/4620205)
Supplement: Supplementary file 1 [file 4620205]

## Submission Requirement – Chemistry of Materials

**All manuscript submissions to Chemistry of Materials now require a Table of Contents (TOC) graphic and brief summary**

**PLEASE SUBMIT THIS ITEM DIRECTLY TO THE EDITOR ASSIGNED TO YOUR MANUSCRIPT (SEE ACKNOWLEDGEMENT LETTER) VIA EMAIL ATTACHMENTS OR POSTAL MAIL**

|                                                                                                                                                                                                                                                            |                                                                                                                                                                                                                                                                                                                                                                               |                                                                                     |
|------------------------------------------------------------------------------------------------------------------------------------------------------------------------------------------------------------------------------------------------------------|-------------------------------------------------------------------------------------------------------------------------------------------------------------------------------------------------------------------------------------------------------------------------------------------------------------------------------------------------------------------------------|-------------------------------------------------------------------------------------|
| <p>Gaurav Gupta, Mehul N. Patel, Domingo Ferrer, Andrew T. Heitsch, Brian A. Korgel, Miguel Jose-Yacamán and Keith P. Johnston*</p> <p><i>Chem. Mater.</i>, <b>submitted</b></p> <p>Stable Ordered FePt Mesoporous Silica Catalysts with High Loadings</p> | <p>Pre-synthesized FePt nanocrystals (&lt; 4 nm), coated with oleic acid and oleylamine ligands are infused in the mesoporous silica pores at high metal loadings. The strong metal-support interactions favored by weakly binding ligands impart stability against sintering at high temperatures, enabling ordering of the crystal structure without size perturbation.</p> | 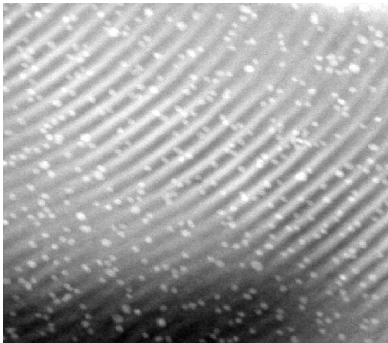 |
|------------------------------------------------------------------------------------------------------------------------------------------------------------------------------------------------------------------------------------------------------------|-------------------------------------------------------------------------------------------------------------------------------------------------------------------------------------------------------------------------------------------------------------------------------------------------------------------------------------------------------------------------------|-------------------------------------------------------------------------------------|
